# Supplementary material for: Impact of cerebellar stroke on established and emergent reading skills: Evidence of alexia
Source: Research Square preprint supplement (doi:10.21203/rs.3.rs-6614964/v1), 2025-05-16
Supplement: Supplementary file 1 [file 2fc20bb461f8899075289731.docx]

**Appendix**

**Table A1.** Stimuli used in in the static assessment of reading. During the lexical decision task, participants saw target pseudowords and words. Foil pseudowords were used in the choice task.

| **Pseudowords** | | | | | |
| --- | --- | --- | --- | --- | --- |
| # | Target | Acceptable pronunciation, IPA | Foils | | |
| Vowel alteration (homophones) | Consonant alteration | Vowel + consonant alteration |
| 1 | bleaz | /bliːz/ | bleez | bleax | bleex |
| 2 | blerm | /blɜːrm/ | blirm | blern | blirn |
| 3 | broap | /broʊp/ | brope | broan | brone |
| 4 | clees | /kliːs/, /kliːz/ | cleas | cleex | cleax |
| 5 | clome | /kloʊm/ | cloam | clowe | cloaw |
| 6 | drate | /dreɪt/ | drait | drare | drair |
| 7 | feave | /fiːv/ | feeve | feawe | feewe |
| 8 | ferd | /fɜːrd/ | furd | ferj | furj |
| 9 | fleach | /fliːʧ/ | fleech | fleack | fleeck |
| 10 | jirt | /dʒɜːrt/ | jurt | jirl | jurl |
| 11 | lirth | /lɜːrθ/ | lyrth | lirtk | lyrtk |
| 12 | nurch | /nɜːrʧ/ | nerch | nurck | nerck |
| 13 | shroak | /ʃroʊk/ | shroke | shroah | shrohe |
| 14 | slerm | /slɜːrm/ | slirm | slern | slirn |
| 15 | smeel | /smiːl/ | smeal | smeet | smeat |
| 16 | zerm | /zɜːrm/ | zurm | zern | zurn |
| **Words** | | | | | |
| # | Word | # | Word | # | Word |
| 1 | bird | 12 | dirt | 23 | scope |
| 2 | birth | 13 | grate | 24 | shrink |
| 3 | bleach | 14 | hurt | 25 | slice |
| 4 | bleak | 15 | knees | 26 | steal |
| 5 | bleed | 16 | leave | 27 | steel |
| 6 | blend | 17 | lurch | 28 | stern |
| 7 | blurt | 18 | nerd | 29 | stroke |
| 8 | clean | 19 | north | 30 | term |
| 9 | clone | 20 | peeve | 31 | train |
| 10 | close | 21 | perch | 32 | worm |
| 11 | croak | 22 | preach |  |  |

**Table A2.** Artificial orthography stimuli used in in the dynamic assessment of reading.

| Reading type | # | Vowel | Length | Target | Minimal pair |
| --- | --- | --- | --- | --- | --- |
| practice | 1 | AY | 2 | TIE |  |
| practice | 2 | IH | 3 | PIT |  |
| practice | 3 | EY | 3 | STAY |  |
| practice | 4 | AY | 4 | PRICE |  |
| practice | 5 | IH | 4 | RISK |  |
| practice | 6 | EY | 4 | STATE |  |
| with feedback | 1 | AY | 2 | ICE | ACE |
| with feedback | 2 | AY | 2 | PIE | PAY |
| with feedback | 3 | AY | 3 | SPY | SPAY |
| with feedback | 4 | AY | 3 | TRY | TRAY |
| with feedback | 5 | EY | 2 | SAY | SIGH |
| with feedback | 6 | EY | 2 | RAY | RYE |
| with feedback | 7 | EY | 3 | PACE | PISS |
| with feedback | 8 | EY | 3 | TAPE | TYPE, TIP |
| with feedback | 9 | IH | 2 | IT | ATE |
| with feedback | 10 | IH | 3 | KIT | KITE, KATE |
| with feedback | 11 | IH | 4 | TRICK | TRIKE |
| with feedback | 12 | IH | 3 | SICK | PSYCH, SAKE |
| without feedback | 1 | AY | 4 | TRITE | TRAIT |
| without feedback | 2 | AY | 4 | SPITE | SPIT |
| without feedback | 3 | AY | 4 | SPIKE | SPICK |
| without feedback | 4 | AY | 3 | RICE | RACE |
| without feedback | 5 | AY | 3 | RIGHT | RATE |
| without feedback | 6 | AY | 3 | CRY | CRAY |
| without feedback | 7 | EY | 4 | PASTE | PISSED |
| without feedback | 8 | EY | 4 | SPACE | SPICE |
| without feedback | 9 | EY | 4 | SKATE | SKIT |
| without feedback | 10 | EY | 3 | TAKE | TICK, TYKE |
| without feedback | 11 | EY | 3 | CAKE | KICK |
| without feedback | 12 | EY | 3 | PRAY | PRY |
| without feedback | 13 | IH | 4 | SKIP | SKYPE, SCAPE |
| without feedback | 14 | IH | 4 | STICK | STEAK |
| without feedback | 15 | IH | 4 | TRIP | TRIPE |
| without feedback | 16 | IH | 3 | SIT | SITE |
| without feedback | 17 | IH | 3 | KISS | CASE |
| without feedback | 18 | IH | 3 | PICK | PIKE |
